# Supplementary material
Source: PubMed Central journal article supplement (PMC490883)
Supplement: jbacter_186_16_5442__1.pdf [file jbacter_186_16_5442__1.pdf]

## Supplemental Methods

**Pathogenicity tests.** Six-month-old uniform sized Pera sweet orange trees (*Citrus sinensis*) were maintained without watering for 2 days before inoculation for easier uptake of the bacterial suspension. Plants were inoculated as follows: 50 µl drops of the bacterial culture were applied in 20 different places along the stem and the drops were introduced in the xylem by puncturing with a 22 gauge x 1” needle. For each strain, a total of 15 plants were inoculated. Four plants were treated with *X. fastidiosa*-free PW medium in the same way and used as negative control. In addition, four other plants were maintained without inoculation. Inoculated and control plants were kept in a greenhouse and watered every 2 days. Five plants (1 month old seedlings) of *Nicotiana tabaccum* (accession clevelandii) were inoculated with each culture as described above and kept in a greenhouse. Detection of *X. fastidiosa* in host plants followed the procedure described in (1).

**DNA Microarray Construction.** PCR primers were designed to amplify unique internal fragments of 200-1000 bp of each predicted CDS described in the annotated genome sequence of *X. fastidiosa* strain 9a5c (<http://aeg.lbi.ic.unicamp.br/xf>). Primers (18-23mers) with equivalent predicted melting temperature were designed with the use of a perl program that ran PRIMER3 ([http://www-genome.wi.mit.edu/genome\\_software/other/primer3.html](http://www-genome.wi.mit.edu/genome_software/other/primer3.html)) for the complete CDS list, automatically testing many parameter settings and also guaranteeing that primers hybridized only to a single genome location. Oligonucleotides were synthesized by MWG and Operon Technologies. Genomic or cosmid DNA, obtained in the *X. fastidiosa* genome sequencing project (3), were used as template in the first round of PCR amplification, and 200-fold-diluted PCR products were used as templates for PCR reamplification to increase product concentration when necessary. The reactions were done in 96-well plates. The mixture in each well contained 100 ng of DNA, 0.5 U of Biolase Taq polymerase (Bioline), 0.2 mM of each dNTP (Invitrogen), 1.5 mM MgCl<sub>2</sub> and the primers at 0.5 µM, in a total volume of 100 µl. A 5min denaturing step at 95°C was applied, followed by 40 cycles of 95°C for 45s, 50°C for 30s, 72°C for 1min and a final step at 72°C for 10min. 4 µl of each PCR reaction were checked for product size and concentration by

electrophoresis in 1.2% agarose gels. The amplicons were then purified with 96-well MultiScreen purification plates (Millipore) and an equal volume of dimethyl sulfoxide was added to the purified products (~100 ng/ $\mu$ l final concentration). Generation III DNA spotter (Amersham Biosciences) was used to array the samples onto coated type-7 glass slides (Amersham Biosciences). This spotter arrays two technical replicas of each sample, one in each longitudinal half of the slides. Thus, a 6152-element array was printed, representing 2692 CDS spotted at least in duplicate. After deposition, the spotted DNA samples were crosslinked to the coated slides by applying 50 mJ of UV light and the slides were stored desiccated at ~10% relative humidity at room temperature until use.

**DNA and RNA Labeling .** Whole genomic DNA from either 9a5c or J1a12 strain was fragmented by shearing and used in the synthesis of targets by direct incorporation of fluorescent nucleotide analogs (Cy3-dCTP or Cy5-dCTP, Amersham Biosciences) as described in [http://cmgm.stanford.edu/pbrown/protocols/4\\_genomic.html](http://cmgm.stanford.edu/pbrown/protocols/4_genomic.html) and using random nonamers. Total RNA was extracted using hot phenol procedure adapted from <http://caulobacter.stanford.edu/CellCycle/protocols/RNAIsolation.htm> and contaminating DNA was removed with RQ1-RNase free DNase (Promega). 20  $\mu$ g of total RNA was used for cDNA labeling using CyScribe Post-Labeling Kit (Amersham Biosciences) and random nonamers.

**Hybridization conditions.** Labeled DNA or cDNA fragments from both strains were combined in the hybridization mixture containing 50% formamide and hybridization buffer (Amersham Biosciences) in a final volume of 54 $\mu$ l. The mixture was heated to 92°C for 2min, cooled on ice and applied to the microarray. A cover slip was used to spread the solution throughout the microarray and the slide was then placed in a 50mL Falcon tube that was sealed and horizontally positioned for hybridization in a 42°C water bath for 16 hours. After hybridization, slides were washed at 55°C for 10 min in 1x SSC buffer containing 0.2% SDS and twice for 10min in 0.1x SSC buffer containing 0.2% SDS, followed by 1min at room temperature in 0.1x SSC and a quick rinse in ddH<sub>2</sub>O. After drying with N<sub>2</sub> in a clean room, the slides were ready for scanning.

**Data Acquisition and Analysis.** A Generation III DNA scanner (Amersham Biosciences) was used to acquire monochromatic images of  $10\mu\text{m}/\text{pixel}$  from the microarray slides, corresponding to channels Cy3 (532 nm laser and PMT at 700 V) and Cy5 (633 nm and PMT at 750 V). For each slide, images of the left and right replicas were recovered. Images were analyzed with ArrayVision 6.0 software (Imaging Research Inc.). The artifact-removed mean density (ARMdens) of signal intensity was the measure chosen for signal quantification. This measure removes pixels with signals above 4 MADs (median of absolute deviation) of the mean signal intensity of all pixels within a spot, such as those representing dust particles. The median of the background intensity was calculated for a frame of  $24000\mu\text{m}^2$  around each spot of  $180\mu\text{m}$  in diameter and the value was subtracted from the spot's ARMdens value. This represents the raw data used in the normalization procedure.

**Normalization Procedure.** Several imbalance errors affect the true ratio measure. We have assumed that all imbalance, due to enzyme efficiency, wavelength detection, dye brightness, etc, can be approximated by multiplicative factors that are contained into just one normalization constant that depends non-linearly on signal intensities. In order to normalize the Cy3 and Cy5 signal intensities ( $I_{\text{Cy3}}$  and  $I_{\text{Cy5}}$ ) we have used the hypothesis that the great majority of genes are equally present in both strains (same number of copies) and therefore the predominant ratio must be one. This is a reasonable hypothesis given that our microarray contains fragments of all CDS of the 9a5c strain genome. We have performed the LOWESS fitting (included in the R package, available at <http://www.r-project.org>) on M vs A plot in order to obtain, locally and non-parametrically, the normalization constant and thus normalized ratios, following (5). As defined in that work,  $A = 1/2 * \log_2(I_{\text{Cy5}} * I_{\text{Cy3}})$  and  $M = \log_2(I_{\text{Cy5}} / I_{\text{Cy3}})$ . Lowess normalization eliminated the dye bias of the ratios, therefore these were all calculated as J1a12 / 9a5c (independent of dye) for a better visualization in M-A plots.

**Intensity-dependent ratio cutoff level.** We have performed homotypical hybridizations (9a5c strain DNA labeled with either Cy3-dCTP or Cy5-dCTP and hybridized simultaneously to the same microarray) in order to derive intrinsic experimental variability

of the 1:1 ratio (noise) and to set an upper and lower limit for this noise. With this approach, we have detected a clear dependence between ratio, estimated by  $M$ , and total foreground intensity of each CDS, estimated by  $A$ . CDS with intensities above but close to background strongly varied inside  $[0;\infty]$ , or in logarithm scale, inside  $[-\infty;\infty]$  when the expected result is ratio = 1 or  $\log_2(\text{ratio}) = 0$ . We used 3 independent hybridization experiments (3 slides, 6 images) as samplings from experimental error around 1:1 bi-dimensional probability density distribution. We conditioned this distribution in arbitrary  $A$  intervals to make it one-dimensional and estimated the density distribution using Kernel Density Estimators (2). Finally, we integrated this density around mode peak until 0.995 probability was reached, to determine an intensity-dependent ratio cutoff level. These cutoffs levels were subsequently used in the analysis of replicas of 9a5c vs J1a12 hybridization experiments; spots outside these credibility intervals present strong evidence against 1:1 ratio.

**CDS classification process.** Four categories were defined for the CDS in the J1a12 genome based on its orthologous 9a5c counterpart: (i) equally present in both strains, (ii) highly divergent or absent in J1a12 (iii) divergent and (iv) higher copy number in J1a12. Category (i) includes all the CDS for which  $\geq 60\%$  of the replicas were inside the credibility intervals. In order to separate categories (ii) and (iii), we performed 4 control hybridizations with DNA from the sequenced *X. fastidiosa* strain Temecula (Tc) (4). The 9a5c amplicons were BLASTed locally against the Tc genome (<http://aeg.lbi.ic.unicamp.br/world/xfpd>). Amplicons with  $\leq 20\%$  nucleotide identities were used to determine the “highly divergent or absent”  $M$  value cut-off threshold. The  $M$  value with the least false callings was  $-1.7$ . At this threshold, 19 false positives and 23 false negatives were observed (0.76% and 0.92%, respectively). Category (ii) includes CDS with  $P$ -value smaller than 0.05 in a  $t$ -test against the null hypothesis  $H_0: M \geq -1.7$ . This threshold was further supported by sequencing some amplicons from J1a12 that were outside the credibility intervals and checking the divergence between 9a5c and J1a12 sequences. The remaining CDS were considered (iii) divergent if  $M$ -values were negative or (iv) present at higher copy number in J1a12 (positive  $M$  values). CDS with low replicas’ consistency (less than 60% of replicas in a single category) were excluded from the analysis.

**Validation of microarray data.** PCR and RT-PCR were performed using CDS specific primers were performed to confirm the status of CDS in the genome of J1a12 strain determined using the microarray data. The reactions were carried out with genomic DNA or cDNA from strain 9a5c or J1a12 using 35 cycles of amplification. A 4µl sample of each reaction was electrophoresed in 1.2% agarose gels and DNA was stained with ethidium bromide. The amplicons were then classified by visual inspection as absent, same copy number or more abundant in J1a12 strain in relation to 9a5c. In addition, DNA sequence determination was carried out for a few CDS. For that, the PCR products were cloned in pGEM-TEasy vector (Promega) and dideoxy sequencing reactions were performed using 100 ng of plasmid DNA in Big Dye Terminator sequencing reactions (Applied Biosystems) according to the manufacturer's instructions. Sequencing reactions were carried out using either CDS specific or T7 promoter primers.

#### References:

1. **Pooler, M. R., and J. S. Hartung.** 1995. Specific PCR detection and identification of *Xylella fastidiosa* strains causing citrus variegated chlorosis. *Curr. Microbiol.* **31**:377-381.
2. **Silverman, B. W.** 1986. Density estimation. Chapman and Hall, London.
3. **Simpson, A. J., F. C. Reinach, P. Arruda, F. A. Abreu, M. Acencio, R. Alvarenga, L. M. Alves, J. E. Araya, G. S. Baia, C. S. Baptista, M. H. Barros, E. D. Bonaccorsi, S. Bordin, J. M. Bove, M. R. Briones, M. R. Bueno, A. A. Camargo, L. E. Camargo, D. M. Carraro, H. Carrer, N. B. Colauto, C. Colombo, F. F. Costa, M. C. Costa, C. M. Costa-Neto, L. L. Coutinho, M. Cristofani, E. Dias-Neto, C. Docena, H. El-Dorry, A. P. Facincani, A. J. Ferreira, V. C. Ferreira, J. A. Ferro, J. S. Fraga, S. C. Franca, M. C. Franco, M. Frohme, L. R. Furlan, M. Garnier, G. H. Goldman, M. H. Goldman, S. L. Gomes, A. Gruber, P. L. Ho, J. D. Hoheisel, M. L. Junqueira, E. L. Kemper, J. P. Kitajima, J. E. Krieger, E. E. Kuramae, F. Laigret, M. R. Lambais, L. C. Leite, E. G. Lemos, M. V. Lemos, S. A. Lopes, C. R. Lopes, J. A. Machado, M. A. Machado, A. M. Madeira, H. M. Madeira, C. L. Marino, M. V. Marques, E. A. Martins, E. M. Martins, A. Y. Matsukuma, C. F. Menck, E. C. Miracca, C. Y. Miyaki, C. B. Monteriro-Vitorello, D. H. Moon, M. A. Nagai, A. L. Nascimento, L. E. Netto, A. Nhani, Jr., F. G. Nobrega, L. R. Nunes, M. A. Oliveira, M. C. de Oliveira, R. C. de Oliveira, D. A. Palmieri, A. Paris, B. R. Peixoto, G. A. Pereira, H. A. Pereira, Jr., J. B. Pesquero, R. B. Quaggio, P. G. Roberto, V. Rodrigues, M. R. A. J. de, V. E. de Rosa, Jr., R. G. de Sa, R. V. Santelli, H. E. Sawasaki, A. C. da Silva, A. M. da Silva, F. R. da Silva, W. A. da**

- Silva, Jr., J. F. da Silveira, et al.** 2000. The genome sequence of the plant pathogen *Xylella fastidiosa*. *Nature* **406**:151-157.
4. **Van Sluys, M. A., M. C. de Oliveira, C. B. Monteiro-Vitorello, C. Y. Miyaki, L. R. Furlan, L. E. Camargo, A. C. da Silva, D. H. Moon, M. A. Takita, E. G. Lemos, M. A. Machado, M. I. Ferro, F. R. da Silva, M. H. Goldman, G. H. Goldman, M. V. Lemos, H. El-Dorry, S. M. Tsai, H. Carrer, D. M. Carraro, R. C. de Oliveira, L. R. Nunes, W. J. Siqueira, L. L. Coutinho, E. T. Kimura, E. S. Ferro, R. Harakava, E. E. Kuramae, C. L. Marino, E. Giglioti, I. L. Abreu, L. M. Alves, A. M. do Amaral, G. S. Baia, S. R. Blanco, M. S. Brito, F. S. Cannavan, A. V. Celestino, A. F. da Cunha, R. C. Fenille, J. A. Ferro, E. F. Formighieri, L. T. Kishi, S. G. Leoni, A. R. Oliveira, V. E. Rosa, Jr., F. T. Sasaki, J. A. Sena, A. A. de Souza, D. Truffi, F. Tsukumo, G. M. Yanai, L. G. Zaros, E. L. Civerolo, A. J. Simpson, N. F. Almeida, Jr., J. C. Setubal, and J. P. Kitajima.** 2003. Comparative analyses of the complete genome sequences of Pierce's disease and citrus variegated chlorosis strains of *Xylella fastidiosa*. *J. Bacteriol.* **185**:1018-1026.
5. **Yang, Y. H., S. Dudoit, P. Luu, D. M. Lin, V. Peng, J. Ngai, and T. P. Speed.** 2002. Normalization for cDNA microarray data: a robust composite method addressing single and multiple slide systematic variation. *Nucleic Acids Res.* **30**:e15.

## Supplementary Tables

**Table 1S: CDS divergent in strain J1a12**

| <b>Gene ID<sup>a</sup></b> | <b>Product</b>                               | <b>M<sup>c</sup></b> |
|----------------------------|----------------------------------------------|----------------------|
| XF0075                     | hypothetical protein                         | -0.56                |
| XF0078                     | fimbrial adhesin precursor                   | -0.77                |
| XF0157                     | hypothetical protein                         | -0.91                |
| XF0262                     | colicin V precursor                          | -0.92                |
| XF0263                     | colicin V precursor                          | -0.75                |
| XF0500                     | phage-related repressor protein              | -1.51                |
| XF0501                     | conserved hypothetical protein               | -1.30                |
| XF0614                     | hypothetical protein                         | -0.35                |
| XF0626                     | hypothetical protein                         | -1.00                |
| XF0659                     | cell cycle protein                           | -0.41                |
| XF0663                     | hypothetical protein                         | -1.53                |
| XF0665                     | hypothetical protein                         | -1.19                |
| XF0666                     | hypothetical protein                         | -1.19                |
| XF0668                     | hemolysin-type calcium binding protein       | -0.68                |
| XF0684                     | phage-related protein                        | -0.70                |
| XF0696                     | phage-related repressor protein <sup>b</sup> | -1.78                |
| XF1057                     | hypothetical protein                         | -0.58                |
| XF1306                     | hypothetical protein                         | -1.33                |
| XF1588                     | hypothetical protein <sup>b</sup>            | -1.71                |
| XF1589                     | plasmid stabilization protein                | -1.62                |
| XF1590                     | plasmid stabilization protein                | -0.91                |
| XF1609                     | glucose/galactose transporter                | -0.74                |
| XF1664                     | hypothetical protein <sup>b</sup>            | -1.71                |
| XF1720                     | hypothetical protein                         | -0.40                |
| XF1733                     | tryptophan repressor binding protein         | -0.38                |
| XF1746                     | alcohol dehydrogenase                        | -0.70                |
| XF1756                     | hypothetical protein                         | -0.60                |
| XF1758                     | hypothetical protein                         | -0.58                |
| XF1786                     | phage-related protein                        | -0.39                |
| XF1851                     | serine protease                              | -0.54                |

|        |                                                                                                |       |
|--------|------------------------------------------------------------------------------------------------|-------|
| XF1859 | hypothetical protein                                                                           | -0.60 |
| XF1862 | conserved hypothetical protein                                                                 | -1.19 |
| XF1873 | conserved hypothetical protein                                                                 | -0.70 |
| XF1877 | hypothetical protein                                                                           | -0.76 |
| XF1883 | hypothetical protein                                                                           | -0.73 |
| XF1968 | methyltransferase                                                                              | -1.44 |
| XF2193 | hypothetical protein                                                                           | -1.47 |
| XF2194 | hypothetical protein                                                                           | -1.10 |
| XF2195 | hypothetical protein <sup>b</sup>                                                              | -1.75 |
| XF2217 | imidazoleglycerolphosphate dehydratase/histidinol-phosphate<br>phosphatase bifunctional enzyme | -0.54 |
| XF2307 | hypothetical protein <sup>b</sup>                                                              | -1.73 |
| XF2406 | hypothetical protein                                                                           | -1.02 |
| XF2407 | bacteriocin                                                                                    | -0.93 |
| XF2542 | fimbrial protein                                                                               | -1.07 |
| XF2722 | type I restriction-modification system specificity determinant                                 | -1.25 |
| XF2726 | type I restriction-modification system specificity determinant <sup>b</sup>                    | -1.73 |
| XF2744 | hypothetical protein                                                                           | -0.42 |
| XF2768 | hypothetical protein                                                                           | -1.38 |
| XF2770 | hypothetical protein <sup>b</sup>                                                              | -1.78 |
| XF2772 | hypothetical protein <sup>b</sup>                                                              | -1.78 |

---

<sup>a</sup> the CDS shown here have a hybridization intensity ratio  $-1.7 < M < -0.3$ .

<sup>b</sup> these CDS have a *P*-value greater than 0.05 in the *t*-test and therefore were not classified in category (ii), i.e. absent/highly divergent in J1a12.

<sup>c</sup> DNA hybridization intensity ratios  $M = \log_2(J1a12/9a5c)$  were calculated. For each gene, the values shown are the mean from at least 8 replicas



**Table 2S: CDS possibly presenting higher number of copies in J1a12.**

| <b>Gene ID<sup>a</sup></b> | <b>Product</b>                     | <b>M<sup>b</sup></b> |
|----------------------------|------------------------------------|----------------------|
| XF0391                     | hypothetical protein               | 0.37                 |
| XF0487                     | fimbrillin                         | 0.68                 |
| XF0488                     | hypothetical protein               | 0.77                 |
| XF0490                     | hypothetical protein               | 0.44                 |
| XF0493                     | hypothetical protein               | 0.67                 |
| XF0512                     | hypothetical protein               | 0.65                 |
| XF0513                     | phage-related endolysin            | 0.68                 |
| XF0514                     | hypothetical protein               | 0.76                 |
| XF0515                     | hypothetical protein               | 0.68                 |
| XF0516                     | hypothetical protein               | 0.82                 |
| XF0517                     | hypothetical protein               | 0.56                 |
| XF0518                     | hypothetical protein               | 0.69                 |
| XF0519                     | hypothetical protein               | 0.76                 |
| XF0521                     | conserved hypothetical protein     | 0.58                 |
| XF0523                     | hypothetical protein               | 0.56                 |
| XF0533                     | conserved hypothetical protein     | 0.63                 |
| XF0730                     | phage-related tail protein         | 0.32                 |
| XF1655                     | hypothetical protein               | 0.36                 |
| XF1932                     | hypothetical protein               | 1.37                 |
| XF1933                     | exodeoxyribonuclease III           | 1.23                 |
| XF1934                     | HetI protein                       | 1.17                 |
| XF1935                     | glucose inhibited division protein | 1.01                 |
| XF1936                     | transketolase 1                    | 1.23                 |
| XF1937                     | proton glutamate symport protein   | 1.10                 |
| XF1938                     | hypothetical protein               | 1.07                 |
| XF2112                     | conserved hypothetical protein     | 0.52                 |
| XF2113                     | hypothetical protein               | 0.70                 |
| XF2114                     | hypothetical protein               | 0.61                 |
| XF2122                     | hypothetical protein               | 0.35                 |
| XF2190                     | hypothetical protein               | 0.60                 |
| XF2288                     | phage-related integrase            | 0.66                 |
| XF2289                     | hypothetical protein               | 0.66                 |
| XF2480                     | phage-related tail protein         | 0.36                 |

|         |                              |      |
|---------|------------------------------|------|
| XF2481  | phage-related tail protein   | 0.38 |
| XF2498  | phage-related portal protein | 0.34 |
| XF2499  | hypothetical protein         | 0.38 |
| XF2501  | phage-related protein        | 0.38 |
| XF2512  | hypothetical protein         | 0.85 |
| XF2514  | hypothetical protein         | 0.48 |
| XFa0027 | plasmid maintenance protein  | 1.03 |

---

<sup>a</sup> the CDS shown here have a hybridization intensity ratio  $M > 0.3$ .

<sup>b</sup> DNA hybridization intensity ratios  $M = \log_2(J1a12/9a5c)$  were calculated. For each gene, the values shown are the mean from at least 8 replicas

**Table 3S: CDS presenting higher RNA expression level (2-fold or more) in strain 9a5c.**

| Gene ID <sup>a</sup> | Product                                    | M <sup>b</sup> |
|----------------------|--------------------------------------------|----------------|
| XF0172               | hypothetical protein                       | -1.57          |
| XF0278               | hypothetical protein                       | -2.27          |
| XF0302               | hypothetical protein                       | -2.08          |
| XF0395               | bacterioferritin                           | -1.76          |
| XF0562               | sec-independent protein translocase        | -1.22          |
| XF0692               | hypothetical protein                       | -1.27          |
| XF0968               | hypothetical protein                       | -1.73          |
| XF1056               | hypothetical protein                       | -2.35          |
| XF1063               | 6-phosphogluconolactonase                  | -1.76          |
| XF1107               | carbamoyl-phosphate synthase large chain   | -1.14          |
| XF1111               | peptide chain release factor 2             | -2.09          |
| XF1205               | hypothetical protein                       | -2.30          |
| XF1389               | cytochrome O ubiquinol oxidase, subunit I  | -1.55          |
| XF1390               | cytochrome O ubiquinol oxidase, subunit II | -1.83          |
| XF1676               | conserved hypothetical protein             | -1.61          |
| XF1789               | hypothetical protein                       | -1.43          |
| XF1797               | porphyrin biosynthesis protein             | -1.33          |
| XF1798               | hypothetical protein                       | -1.37          |
| XF2377               | hypothetical protein                       | -1.31          |
| XF2475               | tRNA/rRNA methyltransferase                | -1.18          |
| XF2506               | hypothetical protein                       | -2.69          |
| XF2516               | hypothetical protein                       | -1.79          |
| XF2526               | phage-related protein                      | -1.70          |
| XFa0015              | conjugal transfer protein                  | -1.54          |
| XFa0060              | plasmid replication protein                | -2.81          |

<sup>a</sup> the CDS shown here have a  $P$ -value smaller than 0.05 in a  $t$ -test for the null hypothesis  $H_0: M \geq -1.0$ .

<sup>b</sup> DNA hybridization intensity ratios  $M = \log_2(J1a12/9a5c)$  were calculated. For each gene, the values shown are the mean from at least 4 replicas

**Table 4S: CDS presenting higher RNA expression level (2-fold or more) in strain J1a12.**

| <b>Gene ID<sup>a</sup></b> | <b>Product</b>                                 | <b>M<sup>b</sup></b> |
|----------------------------|------------------------------------------------|----------------------|
| XF0002                     | DNA polymerase III, beta chain                 | 2.20                 |
| XF0123                     | recombination protein RecA                     | 1.34                 |
| XF0155                     | hypothetical protein                           | 1.82                 |
| XF0275                     | adenylate kinase                               | 1.21                 |
| XF0280                     | leucine aminopeptidase                         | 1.36                 |
| XF0301                     | hypothetical protein                           | 1.75                 |
| XF0339                     | conserved hypothetical protein                 | 1.58                 |
| XF0377                     | cytochrome P450-like enzyme                    | 1.69                 |
| XF0449                     | conserved hypothetical protein                 | 1.49                 |
| XF0615                     | 60kDa chaperonin                               | 2.25                 |
| XF0616                     | 10kDa chaperonin                               | 2.30                 |
| XF0872                     | outer membrane protein                         | 1.96                 |
| XF0974                     | hypothetical protein                           | 1.49                 |
| XF0975                     | polyphosphate-selective porin O                | 1.72                 |
| XF1007                     | hypothetical protein                           | 1.71                 |
| XF1009                     | hypothetical protein                           | 1.80                 |
| XF1024                     | outer membrane protein H.8 precursor           | 2.05                 |
| XF1164                     | 50S ribosomal protein L5                       | 1.29                 |
| XF1165                     | 30S ribosomal protein S14                      | 1.55                 |
| XF1168                     | 50S ribosomal protein L18                      | 1.34                 |
| XF1169                     | 30S ribosomal protein S5                       | 1.44                 |
| XF1175                     | 30S ribosomal protein S4                       | 1.16                 |
| XF1177                     | 50S ribosomal protein L17                      | 1.48                 |
| XF1210                     | glutathione S-transferase                      | 1.50                 |
| XF1216                     | colicin V secretion protein                    | 1.44                 |
| XF1248                     | hypothetical protein                           | 3.40                 |
| XF1476                     | ABC transporter membrane protein               | 1.37                 |
| XF1500                     | ATP sulfurylase, small subunit                 | 1.58                 |
| XF1693                     | hypothetical protein                           | 2.45                 |
| XF1881                     | hypothetical protein                           | 1.44                 |
| XF1891                     | di-tripeptide ABC transporter membrane protein | 2.06                 |
| XF2151                     | hypothetical protein                           | 1.21                 |

|         |                                          |      |
|---------|------------------------------------------|------|
| XF2237  | conserved hypothetical protein           | 1.49 |
| XF2241  | periplasmic protease                     | 1.60 |
| XF2336  | two-component system, regulatory protein | 1.28 |
| XF2402  | hypothetical protein                     | 1.63 |
| XF2561  | 30S ribosomal protein S6                 | 1.51 |
| XF2625  | heat shock protein                       | 1.13 |
| XF2750  | hypothetical protein                     | 1.13 |
| XF2755  | hypothetical protein                     | 1.55 |
| XF2773  | hypothetical protein                     | 2.86 |
| XF2779  | hypothetical protein                     | 2.10 |
| XFa0031 | hypothetical protein                     | 1.54 |
| XFa0054 | hypothetical protein                     | 1.65 |

<sup>a</sup> the CDS shown here have a *P*-value smaller than 0.05 in a *t*-test for the null hypothesis

$H_0: M \leq 1.0$ .

<sup>b</sup> DNA hybridization intensity ratios  $M = \log_2(J1a12/9a5c)$  were calculated. For each gene, the values shown are the mean from at least 4 replicas
