# Supplementary material
Source: PubMed Central journal article supplement (PMC490883)
Supplement: jbacter_186_16_5442__2.pdf [file jbacter_186_16_5442__2.pdf]

**Table 5S: CDS classified as absent/highly divergent in J1a12 and their orthologs in other *Xylella* strains.**

| <b>9a5c</b> | <b>Temecula</b> | <b>Dixon</b> | <b>Ann-1</b> |
|-------------|-----------------|--------------|--------------|
| XF0077      | PD0058          | XfasA0349    | XfasO0018    |
| XF0496      | -               | XfasA2055    | -            |
| XF0497      | -               | -            | -            |
| XF0667      | PD1510          | -            | -            |
| XF1250      | PD0517          | XfasA0389    | XfasO0709    |
| XF1646      | PD1015          | XfasA1293    | XfasO1001    |
| XF1707      | -               | XfasA0984    | -            |
| XF1708      | -               | XfasA0983    | -            |
| XF1860      | -               | -            | -            |
| XF1874      | PD0929          | XfasA0140    | XfasO2133    |
| XF1878      | -               | -            | -            |
| XF1884      | PD0907          | -            | XfasO1925    |
| XFb0001     | PDa0002         | -            | -            |
| XFb0002     | -               | -            | -            |

Gene IDs are shown for 9a5c strain (5) and for the corresponding orthologs found by blastp searches in the complete genome sequence of grapevine strain Temecula (6) and in the partial genome sequences of Almond strain Dixon and Oleander strain Ann-1 (1).
